# Supplementary material
Source: PubMed Central journal article supplement (PMC4308512)

## Supplementary material

**Journal Name:** Applied Microbiology and Biotechnology

### **Identification of a Small Molecule Signaling Factor That Regulates the Biosynthesis of the Antifungal Polycyclic Tetramate Macrolactam HSAF in *Lysobacter enzymogenes***

**Yong Han,<sup>1,2</sup> Yan Wang,<sup>1,5</sup> Simon Tombosa,<sup>1</sup> Stephen Wright,<sup>1</sup> Justin Huffman,<sup>1</sup> Gary Yuen,<sup>3</sup> Guoliang Qian,<sup>4</sup> Fengquan Liu,<sup>4</sup> Yuemao Shen,<sup>2\*</sup> and Liangcheng Du<sup>1\*</sup>**

(1) Departments of Chemistry, University of Nebraska-Lincoln, NE 68588, USA

(2) Key Laboratory of Chemical Biology, School of Pharmaceutical Sciences, Shandong University, Jinan 250100, China

(3) Department of Plant Pathology, University of Nebraska-Lincoln, NE 68583, USA

(4) College of Plant Protection, Nanjing Agricultural University, Nanjing 210095, China

(5) College of Marine Life Sciences, Ocean University of China, Qingdao 266003, China

**\*Liangcheng Du (Corresponding author)**

E-mail: [ldu3@unl.edu](mailto:ldu3@unl.edu)

**\*Yuemao Shen (Corresponding author)**

E-mail: [yshen@sdu.edu.cn](mailto:yshen@sdu.edu.cn)

**Table S1.** HPLC gradient elution program for HSAF analysis. Mobile phase A: water containing 0.1% formic acid; mobile phase B: acetonitrile containing 0.1% formic acid; flow rate: 1 mL/min; wavelength for detection: 280 nm.

| Time (min) | MP A (%) | MP B (%) |
|------------|----------|----------|
| 0          | 60       | 40       |
| 4          | 60       | 40       |
| 17         | 30       | 70       |
| 20         | 30       | 70       |
| 25         | 0        | 100      |
| 28         | 0        | 100      |
| 29         | 60       | 40       |

**Table S2.** Sequence of the primers used in this study.

|                                    |                               |
|------------------------------------|-------------------------------|
| 16s-up-realtime PCR                | ACTTCGTGCCAGCAGCCG            |
| 16s-dw-realtime PCR                | CCATTCCCAGGTTGAGCCC           |
| HSAF- <i>nrps</i> -up-realtime PCR | GCAGATTCCGCCGCACAT            |
| HSAF- <i>nrps</i> -dw-realtime PCR | CGAAGCCGAACGAGTTGACC          |
| clp-up-realtime PCR                | CGCCTCTACGACCTGCTGC           |
| clp-down-realtime PCR              | CATCGCCTCGGGTTCCTT            |
| rpfG-up-realtime PCR               | AGCAGTCCGAGAACGTCAA           |
| rpfG-down-realtime PCR             | ATGCGCTCCAGGTAGGC             |
| rpfF-up-realtime PCR               | TGGCGCATCTTGTTTCATCG          |
| rpfF-down-realtime PCR             | TGTGCAAGCGGGTCAGC             |
| rpfC-up-realtime PCR               | TGCGCTACGAGACCCATATC          |
| rpfC-down-realtime PCR             | GTATCGGTCACGGTGAAACG          |
| rpfB-up-realtime PCR               | CGGGGTGTACATCGGATT            |
| rpfB-down-realtime PCR             | AGTTCGCCGCCTACCTG             |
| rpfC-up-disruption                 | GGGGTACCCGAGTGCCTCAACACCATCCA |
| rpfC-down-disruption               | CCCAAGCTTCCGGCCTTCTGCAACAACC  |
| rpfB-up-disruption                 | TAACTCGAGATTCCAGCCACGAA       |
| rpfB-down-disruption               | TATGGATCCATGCTTGAGGATGCGTTC   |

**Table S3.**  $^1\text{H}$ -NMR data of LeDSF3 ( $\text{DCCl}_3$ ),  $\delta$  in ppm,  $J$  in Hz.

| Position | LeDSF3                      |
|----------|-----------------------------|
| 2        | 2.36 (t, $J = 7.5$ Hz, 2 H) |
| 3        | 1.63-1.66 (m, 2 H)          |
| 4-11     | 1.27-1.36 (m, 16 H)         |
| 12       | 1.13-1.18 (m, 2 H)          |
| 13       | 1.51-1.54 (m, 1 H)          |
| 14       | 0.88 (d, $J = 6.6$ Hz, 6 H) |

Figure S1.  $^1\text{H-NMR}$  of LeDSF3

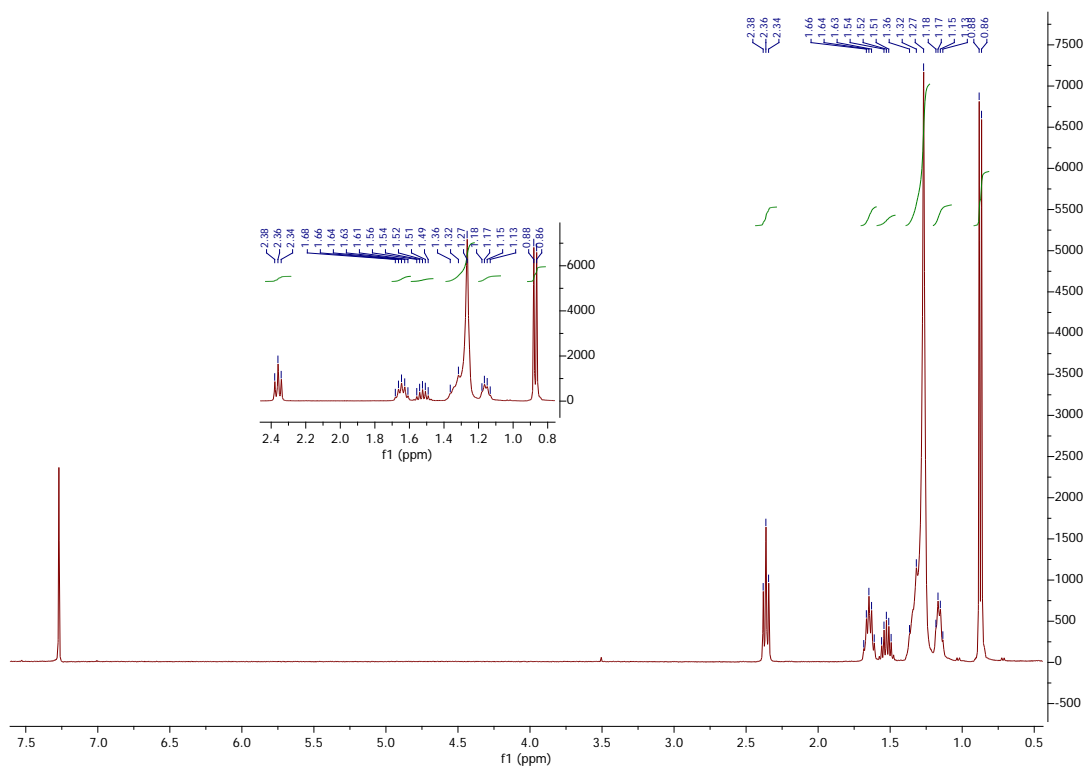

Figure S2.  $^{13}\text{C}$ -NMR of LeDSF3

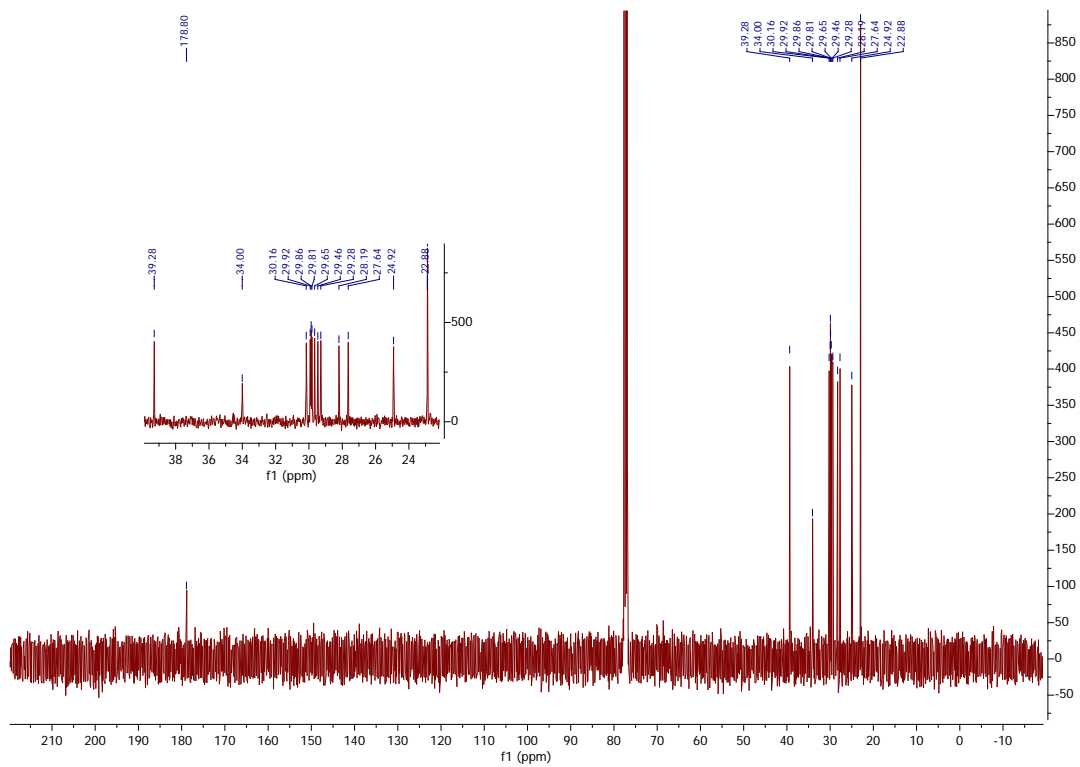

**Figure S3-1. MS of LeDSF3 (negative mode)**

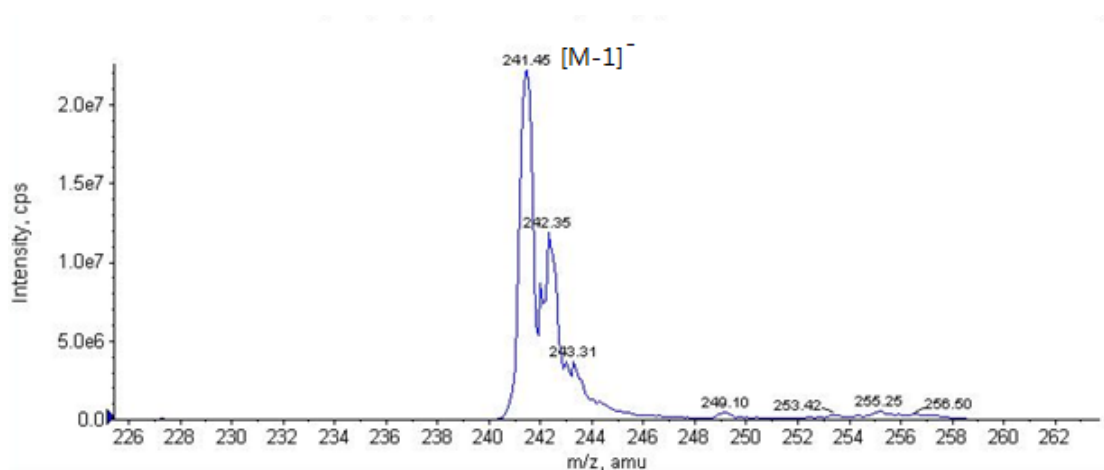

**Figure S3-2. MS of LeDSF3 (positive mode)**

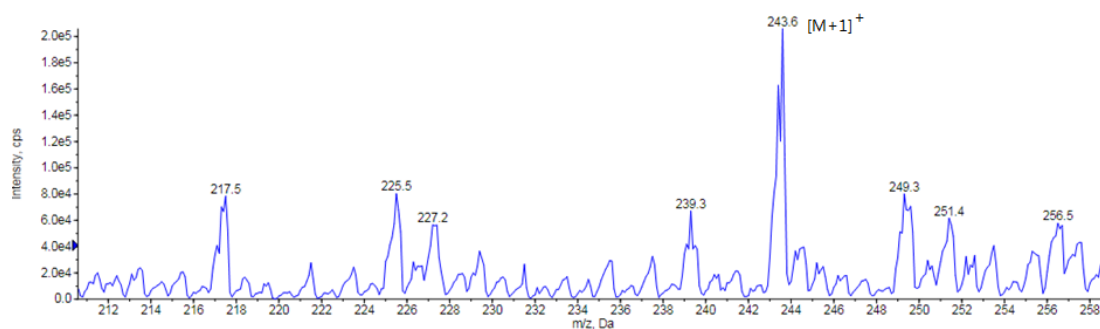

**Figure S3-3. MS-MS of LeDSF3 (MS2)**

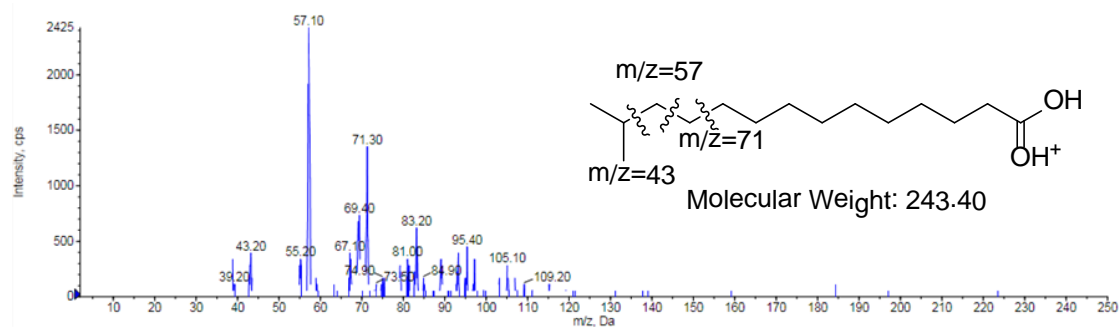

Figure S4. IR of LeDSF3

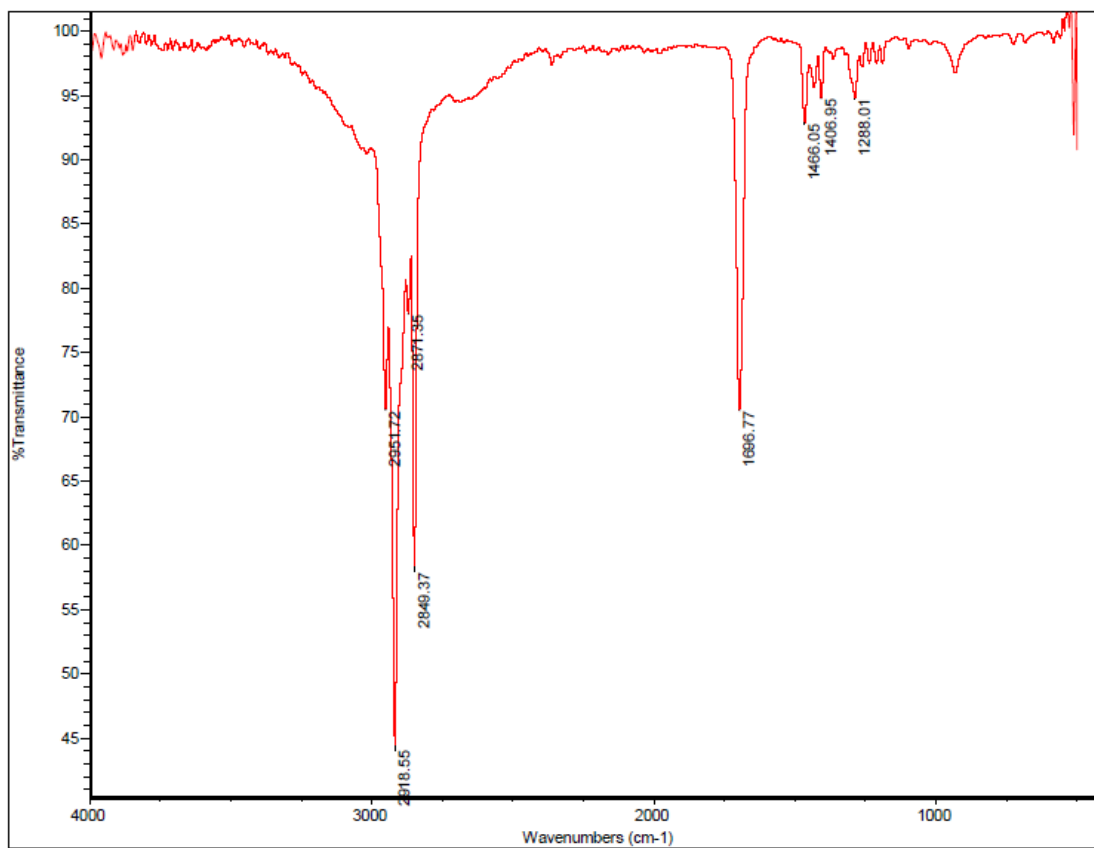



**Figure S5.** The *rpf* gene cluster and predicted promoters in *L. enzymogenes* OH11.

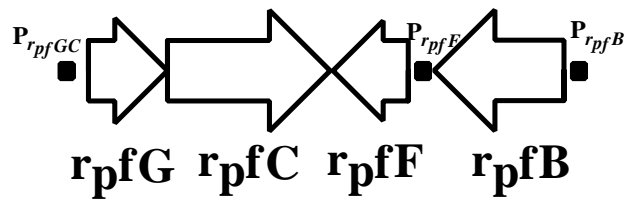

$P_{rpfB}$ : CGGGCACC GCCTTGCCACCCGCTAGAGCCTATGCTCCAAT **C**GAGAAAACA

$P_{rpfF}$ : GAGGGGCTTTTATTTTTCGGCGGAATCGGGGTGTAGCAT **C**GATGCGTGG

$P_{rpfGC}$ : GCTGGTTCGATGACCGACGCGGTGCTGGAGCACAATCCGGA **G**ATCAAGCGC

**Figure S6.** HSAF production in various strains of *L. enzymogenes*. **A:** the wild type *LeOH11*; **B:** *LeOH11ΔrpfB*; **C:** *LeOH11ΔrpfC*; **D:** *LeOH11ΔrpfF*; **E:** *LeOH11ΔrpfG*.

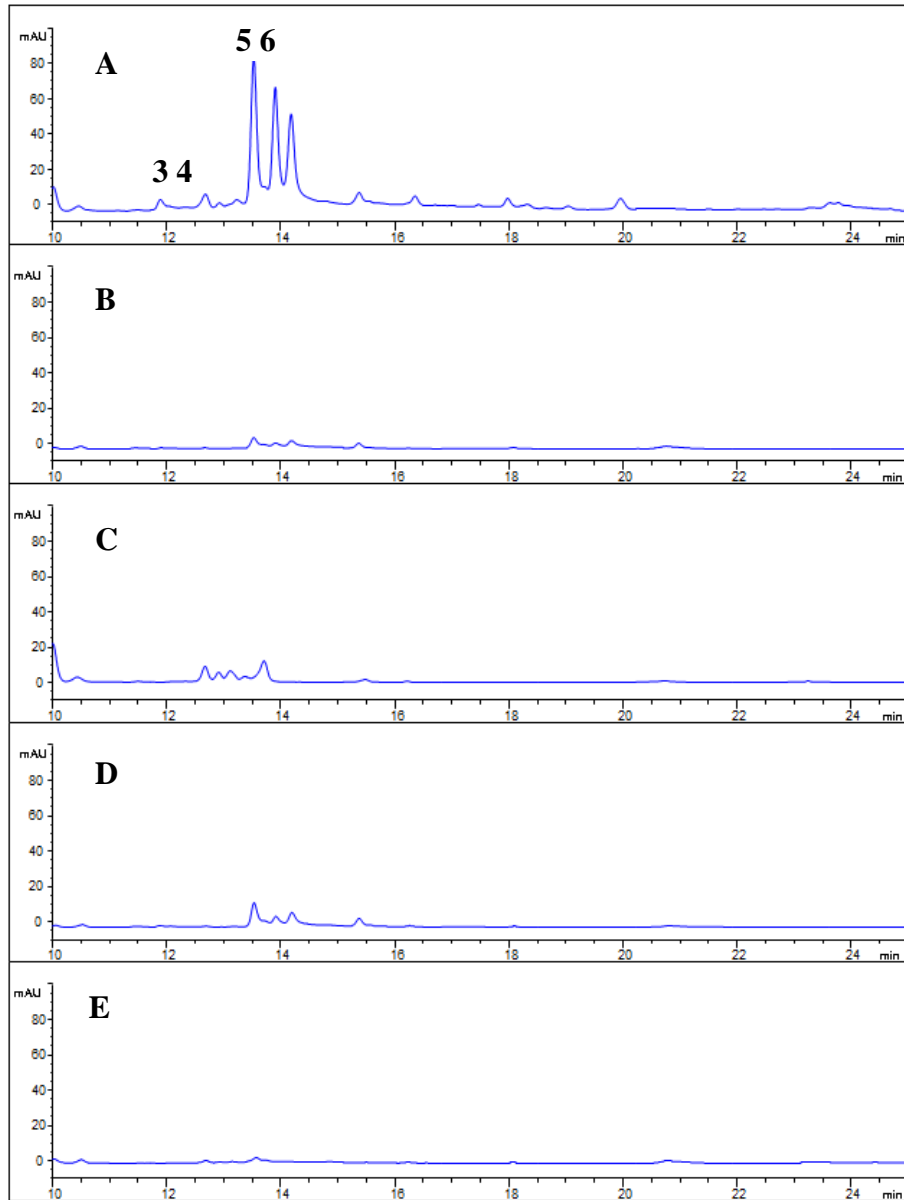

**Figure S7.** Antifungal activity of *LeOH11* and various mutants against *Fusarium verticillioides*. On each of the petri dishes (**A** through **J**), *LeOH11* was spread over the left half of the dish, and *F. verticillioides* was point-inoculated in the center of the right half of the same dish. The blue line was drawn to show the two halves of the same dish. **A** and **F**: the wild type *LeOH11*; **B** and **G**: *LeOH11* $\Delta$ *rpfB*; **C** and **H**: *LeOH11* $\Delta$ *rpfC*; **D** and **I**: *LeOH11* $\Delta$ *rpfF*; **E** and **J**: *LeOH11* $\Delta$ *rpfG*. For all dishes, **A** through **E** show the antifungal activity in the absence of *LeDSF3*, and **F** through **J** the activity in the presence of 5  $\mu$ M *LeDSF3*.

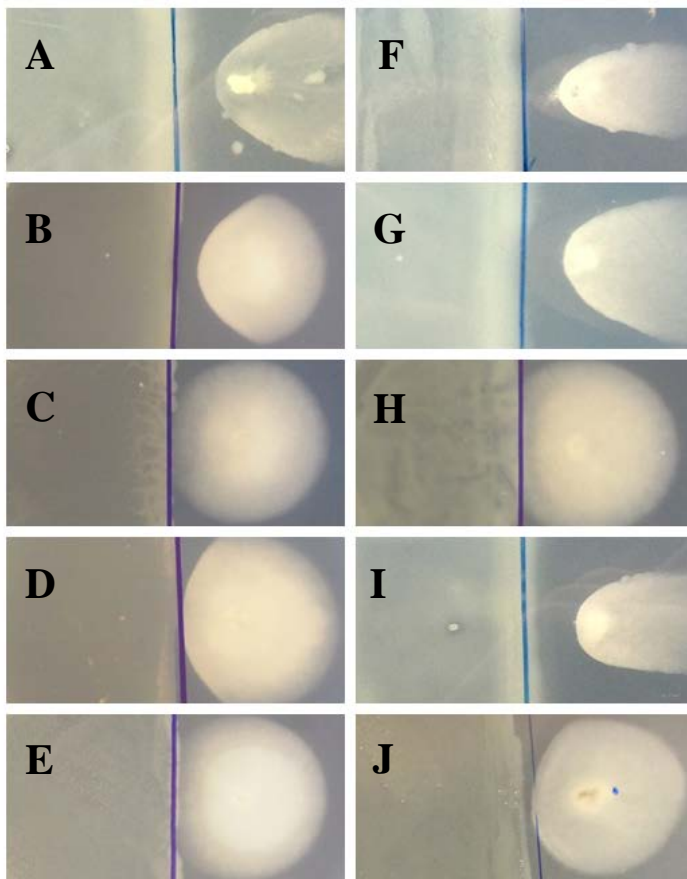

Supplement: NIHMS634534-supplement-253_2014_6120_MOESM1_ESM.pdf [file NIHMS634534-supplement-253_2014_6120_MOESM1_ESM.pdf]
